# Supplementary material for: Unravelling diagnostic clusters and immune landscapes of cuproptosis patterns in intervertebral disc degeneration through dry and wet experiments
Source: publisher site journal article supplement (doi:10.18632/aging.205449), 2023-12-29
Supplement: Supplementary file [file aging-v15i24-205449-supplementary-material-SD2.pdf]

## SUPPLEMENTARY TABLES

**Supplementary Table 1. Sequences of cuproptosis gene-specific primers used for RT-qPCR.**

| cuproptosis genes | Sequence (5'→3')        |                        |
|-------------------|-------------------------|------------------------|
|                   | Forward primer          | Reverse primer         |
| mmu-LIPT1         | TGCTTCCGATTACTTTGTCAGC  | TCCAGTCTTCAAAGCCAGATTT |
| mmu-GCSH          | ATGTCGCTGCAAGTGTCGAG    | ACCGTTCCAATACCTTCCTCT  |
| mmu-DLST          | GGAAGTGCCTCTAGGGAGA     | GACGCTACCACTGTTAATGACC |
| mmu-DLAT          | CTTTAGCCTCCAAAGCGAGAG   | AGATTGTAATGTTCCACCCTGG |
| mmu-PDHB          | AGGAGGGAATTGAATGTGAGGT  | ACTGGCTTCTATGGCTTCGAT  |
| mmu-ATP7A         | ATGGAGCCAAGTGTGGATGC    | GGTTGCACTCTTTTCGCTAGT  |
| mmu-ATP7B         | GGGACGATGCCTGAACAG      | GCCGGGCAAAGCAAGTTTAG   |
| mmu-MTF1          | ACACCTTCGTCTGTAATCAGGA  | CTGCACGTCACACTCAAATGG  |
| mmu-FDX1          | CAAGGGGAAAATTGGCGACTC   | TTGGTCAGACAAACTTGGCAG  |
| mmu-LIAS          | CCTGGGGTCCCGATATTTG     | GAAGGTCTGGTCCATTATGCAA |
| hsa-LIPT1         | CCTCTGTTGTAATTGGTAGGCAT | CTGGGGTTGGACAGCATTAG   |
| hsa-GCSH          | GGAAGCGTTGGGAGATGTTGT   | TCTGAAGGGTACTCAGTGTC   |
| hsa-DLST          | GAAGTGCCTCTAGGGAGAC     | AACCTTCCTGCTGTTAGGGTA  |
| hsa-DLAT          | CGGAAGTCCACGAGTGACC     | CCCCGCCATACCCTGTAGT    |
| hsa-PDHB          | GAAGAGGCGCTTTCCTGGA     | CAGCCCTCGACTAACCTTGT   |
| hsa-ATP7A         | TGACCCTAAACTACAGACTCAA  | CGCCGTAACAGTCAGAAACAA  |
| hsa-ATP7B         | GCCAGCATTGCAGAAGGAAAG   | TGATAAGTGATGACGGCCTCT  |
| hsa-MTF1          | CACAGTCCAGACAACAACATCA  | GCACCAGTCCGTTTTTATCCAC |
| hsa-FDX1          | TTCAACCTGTCACCTCATCTTTG | TGCCAGATCGAGCATGTCATT  |
| hsa-LIAS          | CAGCCCAGTCAGACCGTAAAG   | TTTCTGGCGTTTTAGGTTTCCT |

**Supplementary Table 2. The detailed information of GO enrichment analysis in Figure 2J.**

| Ontology | ID         | Description                                           | p-value     | p.adjust    |
|----------|------------|-------------------------------------------------------|-------------|-------------|
| BP       | GO:0006099 | tricarboxylic acid cycle                              | 3.07E-07    | 3.10E-05    |
| BP       | GO:0006101 | citrate metabolic process                             | 3.36E-07    | 3.10E-05    |
| BP       | GO:0006084 | acetyl-CoA metabolic process                          | 4.33E-07    | 3.10E-05    |
| BP       | GO:0072350 | tricarboxylic acid metabolic process                  | 4.69E-07    | 3.10E-05    |
| BP       | GO:0009060 | aerobic respiration                                   | 5.38E-06    | 0.000285233 |
| BP       | GO:0018065 | protein-cofactor linkage                              | 7.22E-06    | 0.000314143 |
| BP       | GO:0006637 | acyl-CoA metabolic process                            | 9.48E-06    | 0.000314143 |
| CC       | GO:1990204 | oxidoreductase complex                                | 6.79E-08    | 2.17E-06    |
| CC       | GO:0005759 | mitochondrial matrix                                  | 3.94E-07    | 6.30E-06    |
| CC       | GO:0016323 | basolateral plasma membrane                           | 0.003231767 | 0.023815441 |
| CC       | GO:0005802 | trans-Golgi network                                   | 0.003809144 | 0.023815441 |
| CC       | GO:0045240 | dihydrolipoyl dehydrogenase complex                   | 0.004455238 | 0.023815441 |
| CC       | GO:0005770 | late endosome                                         | 0.004465395 | 0.023815441 |
| CC       | GO:0045239 | tricarboxylic acid cycle enzyme complex               | 0.005667284 | 0.025907585 |
| MF       | GO:0016417 | S-acyltransferase activity                            | 8.81E-05    | 0.000866396 |
| MF       | GO:0015662 | ATPase activity, coupled to transmembrane movement of | 9.38E-05    | 0.000866396 |

|    |            |                                                                                                 |             |             |
|----|------------|-------------------------------------------------------------------------------------------------|-------------|-------------|
|    |            | ions, phosphorylative mechanism                                                                 |             |             |
| MF | GO:0016620 | oxidoreductase activity, acting on the aldehyde or oxo group of donors, NAD or NADP as acceptor | 0.000105606 | 0.000866396 |
| MF | GO:0046915 | transition metal ion transmembrane transporter activity                                         | 0.000111793 | 0.000866396 |
| MF | GO:0016903 | oxidoreductase activity, acting on the aldehyde or oxo group of donors                          | 0.000159983 | 0.000898486 |
| MF | GO:0016746 | transferase activity, transferring acyl groups                                                  | 0.0001739   | 0.000898486 |
| MF | GO:0005507 | copper ion binding                                                                              | 0.00030204  | 0.001207755 |

**Supplementary Table 3. The detailed information of KEGG enrichment analysis in Figure 2K.**

| ID       | Description                  | p-value  | p.adjust |
|----------|------------------------------|----------|----------|
| hsa01200 | Carbon metabolism            | 1.27E-06 | 1.17E-05 |
| hsa00020 | Citrate cycle (TCA cycle)    | 1.55E-06 | 1.17E-05 |
| hsa00620 | Pyruvate metabolism          | 0.00067  | 0.00335  |
| hsa04978 | Mineral absorption           | 0.00109  | 0.00403  |
| hsa00010 | Glycolysis / Gluconeogenesis | 0.00136  | 0.00403  |
| hsa01524 | Platinum drug resistance     | 0.00161  | 0.00403  |

**Supplementary Table 4. The detailed information of GO enrichment analysis in Figure 6G.**

| Ontology | ID         | Description                                                 | p-value     |
|----------|------------|-------------------------------------------------------------|-------------|
| BP       | GO:0030903 | notochord development                                       | 0.000963804 |
| BP       | GO:0010288 | response to lead ion                                        | 0.001932265 |
| BP       | GO:0060142 | regulation of syncytium formation by plasma membrane fusion | 0.002444549 |
| BP       | GO:0010038 | response to metal ion                                       | 0.003384556 |
| BP       | GO:0010039 | response to iron ion                                        | 0.003424517 |
| CC       | GO:0005882 | intermediate filament                                       | 0.000457017 |
| CC       | GO:0045111 | intermediate filament cytoskeleton                          | 0.000997498 |
| CC       | GO:0005791 | rough endoplasmic reticulum                                 | 0.001858512 |
| CC       | GO:0008076 | voltage-gated potassium channel complex                     | 0.023029928 |
| CC       | GO:0034705 | potassium channel complex                                   | 0.028726385 |
| MF       | GO:0005184 | neuropeptide hormone activity                               | 0.003629045 |
| MF       | GO:0005200 | structural constituent of cytoskeleton                      | 0.003636338 |
| MF       | GO:0019869 | chloride channel inhibitor activity                         | 0.029550255 |
| MF       | GO:0005249 | voltage-gated potassium channel activity                    | 0.029806881 |
| MF       | GO:0097493 | structural molecule activity conferring elasticity          | 0.032457692 |

**Supplementary Table 5. The top 10 effective compounds from the DSigDB database for 8 significant cuproptosis genes.**

| Index | Compound name                                                                                                    | P-value     | Combined score | Targeted genes |
|-------|------------------------------------------------------------------------------------------------------------------|-------------|----------------|----------------|
| 1     | DIAMIDE CTD 00005785                                                                                             | 2.39E-05    | 4168.651313    | ATP7B; ATP7A   |
| 2     | 1,6,7,8,9,11a,12,13,14,14a-Decahydro-1,13-dihydroxy-6-methyl-4H-cyclopent [f]oxacyclotridecin-4-one CTD 00007351 | 1.03E-04    | 1650.515154    | ATP7B; ATP7A   |
| 3     | D-Penicillamine CTD 00006475                                                                                     | 1.63E-04    | 1233.639334    | ATP7B; ATP7A   |
| 4     | Bathocuproine disulfonate CTD 00001350                                                                           | 4.36E-04    | 658.5990148    | ATP7B; ATP7A   |
| 5     | Adenosine triphosphate CTD 00005324                                                                              | 4.92E-04    | 609.0948614    | ATP7B; ATP7A   |
| 6     | mebendazole HL60 DOWN                                                                                            | 0.001538943 | 287.5086153    | GCSH; DLAT     |

|    |                                   |             |             |                           |
|----|-----------------------------------|-------------|-------------|---------------------------|
| 7  | latamoxef HL60 DOWN               | 0.002086277 | 72.22540191 | GCSH; MTF1;<br>DLST; DLAT |
| 8  | Copper (II) chloride CTD 00001408 | 0.002272749 | 220.8403193 | ATP7B; ATP7A              |
| 9  | Vitinoiin CTD 00007069            | 0.002856297 | 86.9234533  | GCSH; DLST;<br>PDHB       |
| 10 | CID755673 CTD 00004896            | 0.004790703 | 1385.975083 | ATP7B                     |

---
